# Supplementary material for: Straw in Clay Bricks and Plasters—Can We Use Its Molecular Decay for Dating Purposes?
Source: Molecules. 2020 Mar 20;25(6):1419. doi: 10.3390/molecules25061419 (PMC7144354; doi:10.3390/molecules25061419)
Supplement: Supplementary file 1 [file molecules-25-01419-s001.xlsx]

## Sheet: Tabelle1
	wavenumber (cm-1)
material	year	3996.24	3994.31	3992.39	3990.46	3988.53	3986.6	3984.67	3982.74	3980.81	3978.88	3976.96	3975.03	3973.1	3971.17	3969.24	3967.31	3965.38	3963.45	3961.53	3959.6	3957.67	3955.74	3953.81	3951.88	3949.95	3948.03	3946.1	3944.17	3942.24	3940.31	3938.38	3936.45	3934.53	3932.6	3930.67	3928.74	3926.81	3924.88	3922.95	3921.02	3919.09	3917.17	3915.24	3913.31	3911.38	3909.45	3907.52	3905.59
NO	1656	0.0151375	0.0150812	0.0151258	0.0151046	0.015037	0.0150933	0.0152011	0.0152185	0.0152204	0.0152755	0.0153137	0.0151322	0.014799	0.0146319	0.0145376	0.0144107	0.014376	0.0143694	0.0142828	0.0141676	0.014191	0.0144005	0.0145661	0.0145406	0.0144051	0.0142154	0.0140881	0.0140362	0.0138632	0.0137095	0.0137175	0.0136997	0.0136216	0.0134845	0.0132065	0.0128985	0.0126223	0.0123335	0.0122345	0.0125226	0.012947	0.0130253	0.0127345	0.012575	0.012658	0.0127144	0.0127544	0.0128363
AE	1850	0.0137014	0.0135784	0.0136096	0.0137407	0.0137571	0.0136521	0.0135382	0.0134249	0.0133358	0.0133337	0.0133595	0.0133237	0.013288	0.0133462	0.0133951	0.0132931	0.0131172	0.013017	0.0129683	0.0128651	0.0127521	0.0127406	0.0127943	0.0127434	0.0125522	0.012399	0.0123654	0.01234	0.012245	0.0121844	0.0121893	0.0121428	0.0120931	0.0120842	0.0119466	0.0117473	0.0116906	0.0116786	0.0115765	0.0114832	0.0113713	0.0111233	0.0109253	0.0109545	0.0110736	0.011184	0.011371	0.011524
H	1850	0.0148193	0.0148271	0.0150035	0.0151245	0.0150762	0.0149746	0.0148693	0.0146706	0.0144065	0.0143251	0.0144567	0.0145206	0.0144706	0.0144901	0.0145226	0.0144237	0.0142897	0.0142269	0.0141714	0.0141081	0.0140317	0.0139157	0.0138613	0.0138854	0.0138498	0.0137338	0.0137021	0.0137817	0.0137427	0.0135711	0.01349	0.0134296	0.0132545	0.0130135	0.0127761	0.0126715	0.012772	0.0128528	0.012748	0.0127221	0.012873	0.0128579	0.0125939	0.0123871	0.012213	0.0120197	0.0119984	0.0120583
NO	1850	0.0166475	0.0166166	0.0165587	0.0165039	0.0164838	0.0163955	0.0161073	0.0157819	0.0156611	0.0156805	0.0156908	0.0157048	0.0157765	0.0158011	0.0156896	0.0155904	0.0155627	0.0155195	0.0154696	0.0153982	0.0152662	0.0152205	0.0154517	0.0157648	0.015685	0.0151749	0.0148523	0.0148684	0.0147339	0.0145803	0.0147328	0.0148431	0.0147428	0.0145446	0.0142632	0.0141517	0.0143324	0.0143783	0.014095	0.0139107	0.01385	0.0136533	0.0134343	0.0134333	0.0136279	0.0139853	0.0145922	0.0149417
AE	1815	0.0157326	0.0155832	0.0154565	0.0155117	0.0157377	0.0157534	0.0155015	0.0152818	0.0152055	0.0152749	0.0154241	0.0153964	0.0151721	0.0150633	0.0151373	0.0151854	0.0150995	0.0149412	0.0147743	0.0145811	0.0144469	0.0144926	0.0146181	0.0146586	0.0144871	0.0140928	0.0138393	0.0139987	0.0143286	0.0144652	0.0143225	0.0140911	0.0140803	0.0142161	0.0140978	0.0138381	0.0137561	0.013724	0.0136389	0.0136426	0.0136396	0.0135014	0.0134081	0.0133886	0.0132451	0.0130619	0.0131295	0.0134128
H	1815	0.0149311	0.0149929	0.0148216	0.0145458	0.0144679	0.0145392	0.0145551	0.0145058	0.0144975	0.0145354	0.0145169	0.0144145	0.0143371	0.0143049	0.0141756	0.0139739	0.0138697	0.0138423	0.0137262	0.0135824	0.0136634	0.0138242	0.0137751	0.0136494	0.0135431	0.0134022	0.0133822	0.0134652	0.0134413	0.01339	0.0133328	0.0131076	0.0128525	0.0127097	0.0125865	0.0125517	0.0126472	0.0126701	0.0125787	0.012565	0.0125999	0.0125106	0.012341	0.012267	0.0123143	0.0123605	0.0123442	0.0121954
NO	1815	0.015813	0.0157154	0.0152665	0.0147705	0.0147296	0.0150484	0.0152912	0.0152835	0.0151509	0.0151053	0.0152299	0.0154051	0.0154432	0.0152635	0.0149901	0.0148492	0.0148393	0.0148297	0.014783	0.0147046	0.0147319	0.0149243	0.0150418	0.0149056	0.0146448	0.0144124	0.0141347	0.0138105	0.0137129	0.0139524	0.0141383	0.0140002	0.0137727	0.0136548	0.0135622	0.0134779	0.0134724	0.0134809	0.0134018	0.0133392	0.0132751	0.013012	0.0127343	0.0127281	0.012848	0.0128744	0.0127871	0.0125238
AE	1825	0.0205238	0.0206361	0.0207099	0.0206602	0.0205168	0.0204394	0.0204803	0.0205444	0.0205078	0.0203517	0.0202472	0.0201292	0.0198993	0.019787	0.0197996	0.019831	0.0198669	0.0198139	0.0197825	0.0198896	0.0199827	0.0199444	0.019842	0.0198003	0.0197543	0.0195637	0.0192986	0.0191078	0.0190943	0.0192212	0.0193759	0.0195253	0.0195909	0.0193813	0.0189043	0.0186058	0.0186232	0.0185918	0.0185397	0.0187485	0.0189658	0.018851	0.0185015	0.0182462	0.0182962	0.0185011	0.0185685	0.0184029
H	1825	0.0179628	0.0178779	0.0178969	0.0178952	0.0178467	0.0178343	0.0179663	0.0182243	0.0183071	0.0181138	0.0179524	0.0178765	0.0176684	0.0173482	0.0171612	0.0172358	0.0173792	0.0173265	0.0170612	0.0167942	0.0166833	0.0167066	0.0167649	0.0167925	0.0168544	0.0169316	0.0168394	0.0165333	0.016213	0.0162061	0.0163954	0.0163655	0.016147	0.0159773	0.0158802	0.0158703	0.0157864	0.0154826	0.0153492	0.0155058	0.0155242	0.0153329	0.0151676	0.0151382	0.0151925	0.0151942	0.0151601	0.0150676
NO	1825	0.0174785	0.017294	0.0171745	0.0170833	0.0168738	0.0167417	0.0168344	0.0168925	0.0167352	0.0165407	0.0164757	0.016546	0.0166208	0.0165513	0.0164417	0.0164587	0.0165785	0.0166698	0.0166473	0.0166172	0.0166302	0.0164708	0.0160893	0.015829	0.0159291	0.0161647	0.0162694	0.0162019	0.0159223	0.0156197	0.0155289	0.0155318	0.0155028	0.0153891	0.0151262	0.0149031	0.0148847	0.0149771	0.0150641	0.0151217	0.0151728	0.0151635	0.0149782	0.0147337	0.0145783	0.0145346	0.0147293	0.0151384
AE	1875	0.0219197	0.0217896	0.0216182	0.0216231	0.021668	0.0215818	0.0214503	0.0212894	0.0211637	0.0212502	0.0213556	0.0212335	0.0210682	0.0209832	0.020902	0.020787	0.0205939	0.0204452	0.0204576	0.0204837	0.0204121	0.0203045	0.020236	0.0201896	0.0201488	0.02012	0.0201322	0.0202154	0.0202363	0.0200785	0.0198222	0.0196833	0.0197709	0.0197978	0.0195507	0.0192564	0.0190337	0.0188496	0.0188431	0.0190412	0.0192264	0.0192877	0.0192299	0.0191455	0.0191585	0.0192149	0.0191521	0.0188139
H	1875	0.0171512	0.0170244	0.0168536	0.0166622	0.016474	0.0164326	0.0165203	0.0164683	0.0162167	0.0160416	0.0160647	0.0161211	0.0161412	0.0161014	0.0160169	0.0160226	0.0160213	0.0158907	0.015824	0.015843	0.0156696	0.0154106	0.0154158	0.0156004	0.0157065	0.0156225	0.0153966	0.0152285	0.0151771	0.0151226	0.0150477	0.0150257	0.0150289	0.0149834	0.0148488	0.0146712	0.0145993	0.0145933	0.0145332	0.0144666	0.014421	0.0144014	0.0143009	0.0140782	0.0139427	0.0140309	0.0142396	0.014267
NO	1875	0.0168124	0.0167243	0.0169032	0.0169786	0.0167402	0.0165078	0.0165398	0.0167387	0.016807	0.0166192	0.0164677	0.0165213	0.0165288	0.0163763	0.016324	0.0164211	0.0164237	0.0163392	0.0161542	0.0158578	0.0158055	0.0160369	0.016259	0.0164526	0.0165448	0.016336	0.0160113	0.0157182	0.0153491	0.0151569	0.0153743	0.0157193	0.0157447	0.0152804	0.01476	0.0146554	0.0147952	0.0148527	0.0147999	0.0147279	0.0146135	0.0144984	0.014497	0.0146186	0.0147557	0.0148398	0.0149298	0.0150061
AE	1656	0.0149289	0.0147858	0.0146907	0.0145864	0.014589	0.0147222	0.0147813	0.0147363	0.0147629	0.0147749	0.0146393	0.0145876	0.0146869	0.0146462	0.0144283	0.0142298	0.0141654	0.0142711	0.0144486	0.014498	0.0142998	0.0139559	0.0137517	0.0137162	0.0135856	0.013354	0.0133077	0.013488	0.0136701	0.0136474	0.0134143	0.0131834	0.0131646	0.0131555	0.0129442	0.0128664	0.0130035	0.0129934	0.0127944	0.0126939	0.0126839	0.0126458	0.0125516	0.0124653	0.0124697	0.0124567	0.0122909	0.0120919
H	1656	0.0153303	0.0153926	0.0154479	0.0152624	0.0150501	0.0151072	0.0153178	0.0154486	0.0154564	0.0154541	0.0154431	0.0152367	0.0148895	0.0147656	0.0149223	0.0149929	0.0148133	0.0146219	0.01454	0.0144433	0.0143917	0.0144815	0.014493	0.0143346	0.014191	0.0140728	0.0139843	0.0139305	0.013778	0.0135616	0.0133537	0.0133152	0.0136151	0.013935	0.0138469	0.0135791	0.013494	0.0135011	0.0134571	0.0135352	0.0135974	0.0132713	0.0128842	0.0128605	0.0130019	0.0130895	0.0130983	0.0128107
H	1926	0.0154901	0.0152597	0.0153549	0.0156598	0.0158455	0.0158821	0.0158995	0.015788	0.0154604	0.0152527	0.01533	0.0153645	0.0153042	0.0153373	0.0152623	0.0149913	0.0148134	0.014814	0.0149089	0.015054	0.0150725	0.0149057	0.0148457	0.0150148	0.0151754	0.0151258	0.0149178	0.0147071	0.0145364	0.0144372	0.0143117	0.0140209	0.0138551	0.0139825	0.0139886	0.0138865	0.0140486	0.0142257	0.01408	0.0137655	0.0132986	0.0127838	0.0127251	0.0131291	0.0134273	0.0133716	0.0132753	0.0131026
NO	1926	0.0154631	0.0153717	0.0153434	0.015302	0.0153741	0.0154154	0.0153006	0.0152452	0.0153359	0.0154592	0.0155451	0.0155733	0.0155377	0.0154333	0.0152302	0.0150329	0.0150669	0.0152149	0.0151441	0.0149068	0.0147031	0.0145333	0.0144758	0.0146096	0.0147669	0.0147506	0.0145909	0.0144207	0.0142708	0.0141602	0.0141568	0.0142576	0.014366	0.0143345	0.0141388	0.0140204	0.014088	0.0140564	0.0137745	0.0136121	0.0137536	0.0138033	0.0134916	0.0131257	0.0128504	0.0126	0.0125745	0.0129297
AE	1538	0.0206349	0.0206062	0.0204816	0.0203079	0.0201611	0.020075	0.020026	0.0200375	0.0201039	0.0201658	0.0202316	0.0202304	0.0201179	0.0199519	0.0197153	0.0195418	0.0195824	0.019708	0.0197118	0.0195853	0.0194776	0.0193888	0.0192908	0.0192197	0.0190493	0.0187941	0.0187686	0.0189138	0.0188084	0.0185537	0.0185294	0.0186325	0.0186713	0.0186616	0.0185682	0.0185475	0.0187766	0.0188528	0.0186405	0.0185667	0.0184721	0.0181485	0.0178976	0.0177222	0.0174394	0.0171892	0.0172459	0.0174983
H	1538	0.0159595	0.0157425	0.0155983	0.015614	0.0156575	0.0156358	0.0155425	0.0154284	0.0153509	0.0152984	0.0152376	0.0151325	0.0149631	0.0147822	0.0147267	0.0148915	0.0151274	0.0151694	0.0149245	0.0146001	0.0144794	0.0144938	0.0144624	0.0144881	0.0145649	0.0144765	0.0142957	0.0141976	0.0141615	0.0141549	0.0141091	0.014026	0.0140615	0.0141647	0.0141528	0.0140705	0.0139814	0.0138704	0.0137748	0.0136813	0.0135486	0.0134167	0.0132285	0.0130141	0.0129847	0.0131293	0.0133241	0.0134372
NO	1538	0.015981	0.0161531	0.0161482	0.0160811	0.0160611	0.015993	0.0158236	0.0156957	0.0156683	0.0155549	0.0153785	0.0153335	0.0153381	0.0152773	0.0152599	0.0153192	0.0153281	0.0152442	0.015105	0.0149657	0.0148322	0.0146356	0.0145024	0.0146136	0.0148069	0.0147776	0.0145941	0.0145176	0.0144364	0.014193	0.0139593	0.0138541	0.0138821	0.0140117	0.0141231	0.0141902	0.0142639	0.014199	0.0139076	0.0136342	0.0135238	0.0135121	0.0135578	0.0136121	0.0135613	0.0133904	0.0132084	0.0130584
H	1777	0.0147333	0.0148405	0.014893	0.0148598	0.0148432	0.0148352	0.014865	0.0148736	0.0147618	0.014671	0.0146459	0.0145202	0.0143187	0.0142447	0.014316	0.0143516	0.0143362	0.0143813	0.0143708	0.0141942	0.0139641	0.0137269	0.0134851	0.0133685	0.0134784	0.0136635	0.0137691	0.0138607	0.0139228	0.0138833	0.0136882	0.0133461	0.0131082	0.0130494	0.0129468	0.0128214	0.0127635	0.0126392	0.0124524	0.0123797	0.0124373	0.0125372	0.0125446	0.0124344	0.0123288	0.0122874	0.0123524	0.0125328
NO	1777	0.0143906	0.0144209	0.0142955	0.0141885	0.0141331	0.0140801	0.014144	0.0142828	0.0142947	0.0141674	0.0140305	0.0139761	0.0139708	0.0139224	0.0137842	0.0135993	0.0135554	0.0136571	0.0136358	0.0135447	0.0136442	0.0137738	0.0137207	0.0136266	0.0135017	0.0132214	0.0130863	0.0132753	0.0133488	0.0131606	0.0130752	0.013091	0.0129938	0.0127901	0.0126453	0.0126307	0.0126137	0.0124658	0.0122348	0.0121758	0.0123522	0.0123479	0.0120026	0.0117053	0.0115986	0.0116053	0.0117451	0.0119772
H	1668	0.0143683	0.0143076	0.0141387	0.0139876	0.0139483	0.0140439	0.0142156	0.0143329	0.0143118	0.0141204	0.0138527	0.0137431	0.0138012	0.013862	0.0138826	0.0138615	0.0138085	0.0136887	0.0134484	0.0132167	0.0131509	0.013181	0.0131524	0.0130775	0.0130093	0.0129231	0.0128869	0.0129392	0.012963	0.012892	0.0127981	0.0127502	0.0126888	0.012551	0.0124554	0.0124564	0.0123952	0.0122188	0.0120761	0.0120028	0.0119513	0.0119116	0.0118251	0.0117579	0.0117573	0.0117329	0.01175	0.0119203
NO	1668	0.0159933	0.0158557	0.01576	0.0158612	0.0160087	0.0159778	0.015952	0.01594	0.0157677	0.015677	0.0157315	0.0156248	0.0153685	0.0152138	0.0151842	0.0151564	0.01526	0.0155626	0.0156781	0.0154229	0.0150823	0.0149079	0.0148971	0.0149824	0.0151504	0.0152824	0.0154374	0.0155686	0.0152757	0.0147858	0.0145433	0.0145571	0.0148295	0.01508	0.0149443	0.0147108	0.0147073	0.0146662	0.0144248	0.0144061	0.0146452	0.0144837	0.0138158	0.0134218	0.013538	0.0137534	0.0139776	0.0142747
AE	1810	0.0154211	0.0155403	0.015534	0.0152436	0.0149635	0.0150313	0.0152588	0.0153518	0.0152327	0.0149517	0.0147011	0.014639	0.0146284	0.0145033	0.0144015	0.01441	0.0144518	0.0145077	0.0144685	0.0143131	0.0142598	0.0143968	0.0145161	0.0144259	0.0142964	0.0142976	0.0142625	0.0140723	0.0138599	0.0137809	0.0137377	0.0136668	0.0136995	0.0137941	0.0137273	0.0135282	0.0134432	0.0134746	0.0134494	0.013473	0.0136532	0.0136441	0.0131851	0.012711	0.0125775	0.0126383	0.0127721	0.0129406
H	1810	0.0152806	0.0149496	0.0148629	0.0149649	0.0149708	0.0149645	0.015056	0.0149682	0.0146768	0.0144988	0.0144724	0.0145045	0.0144803	0.0143635	0.0143342	0.014336	0.014249	0.0142057	0.0142014	0.0141324	0.0140528	0.0140356	0.0140411	0.0140332	0.01405	0.013988	0.0137849	0.0136111	0.013497	0.0133941	0.0133799	0.0134126	0.0133818	0.0133337	0.0132819	0.0131381	0.0129678	0.0128481	0.0127353	0.0125958	0.0123751	0.0121037	0.0120439	0.0122646	0.0125024	0.0125891	0.012602	0.0126253
NO	1810	0.0171388	0.01683	0.0166914	0.0168185	0.0170781	0.017279	0.0173365	0.0172081	0.0168695	0.0165304	0.0164381	0.0164579	0.0164573	0.0164994	0.0164392	0.0163222	0.0163935	0.0164323	0.0161956	0.0159478	0.0158696	0.0157296	0.015507	0.0155544	0.0158773	0.015976	0.0156454	0.0152426	0.0150574	0.0150372	0.0151731	0.0155184	0.0158319	0.0158489	0.0156188	0.0153896	0.0153584	0.0153247	0.0150292	0.0147404	0.0145994	0.014388	0.0141111	0.0140433	0.014286	0.0146067	0.0147884	0.0147474
AE	1702	0.0223398	0.0222801	0.022323	0.0224525	0.0225502	0.0224492	0.022236	0.0220645	0.0219919	0.0219871	0.0219458	0.0218449	0.0217619	0.0217364	0.0216892	0.0215402	0.0213815	0.0214556	0.0218251	0.0221191	0.0219662	0.0214452	0.0209981	0.0209519	0.0210447	0.0209087	0.0208392	0.0210667	0.0212155	0.0211678	0.0211152	0.0210576	0.021068	0.0210634	0.020788	0.0205657	0.0207838	0.0209888	0.0206648	0.0202122	0.0200123	0.019906	0.019725	0.0194679	0.0191427	0.0189587	0.0192923	0.0198688
H	1702	0.0191844	0.019	0.0187312	0.0186298	0.0187492	0.0188596	0.0187155	0.0184539	0.0183762	0.0184365	0.0184159	0.0182992	0.0182047	0.0182151	0.018207	0.0180126	0.017837	0.0179067	0.0180289	0.0180008	0.0179058	0.0178352	0.0177834	0.0177404	0.0176611	0.0174872	0.0172899	0.0171696	0.0171033	0.0171316	0.0172545	0.0172414	0.0171104	0.0171469	0.0172488	0.0171751	0.0170468	0.0169771	0.0168947	0.0167216	0.0165207	0.0164279	0.0163317	0.0161913	0.0162102	0.0163063	0.0162622	0.0160992
NO	1702	0.0178647	0.0177436	0.0173899	0.017147	0.0172446	0.0176294	0.0179155	0.0179065	0.0177738	0.017576	0.0173368	0.0171772	0.0170513	0.0169112	0.0168682	0.0169339	0.0170139	0.0171477	0.0173048	0.0172025	0.0168124	0.0164671	0.0163351	0.0162423	0.0160671	0.0159773	0.016069	0.0162054	0.016223	0.0161252	0.0159937	0.0158688	0.01589	0.0160169	0.0160231	0.0159269	0.0157546	0.0154306	0.0151468	0.015188	0.0154279	0.0155149	0.0153375	0.015117	0.0151079	0.0152645	0.0153357	0.0151119
AE	1672	0.018511	0.0185447	0.0186013	0.018579	0.018455	0.0183343	0.0182238	0.0181386	0.0181189	0.018083	0.018024	0.0179634	0.0178332	0.0176062	0.0173459	0.0172629	0.0174205	0.0175823	0.0176934	0.0178446	0.0179054	0.0178612	0.0178326	0.017669	0.0173154	0.0170533	0.0170967	0.0173039	0.0172865	0.0170234	0.0168564	0.0168912	0.0169781	0.0167595	0.0161743	0.0158599	0.0161105	0.0163755	0.0162482	0.0161014	0.0161401	0.0160164	0.0156169	0.0153473	0.0153865	0.0155862	0.015945	0.0164014
H	1672	0.0139937	0.0138579	0.0137859	0.013671	0.0135437	0.0135367	0.0135361	0.0134661	0.0134925	0.0135926	0.0135821	0.0135073	0.0135279	0.013587	0.0134066	0.0130173	0.0128354	0.0129229	0.0130058	0.0130451	0.013084	0.0130096	0.0128521	0.0128261	0.0128665	0.0127316	0.0126621	0.0128559	0.0128323	0.012359	0.0118928	0.0117728	0.0119295	0.01206	0.012055	0.0121215	0.0122726	0.012175	0.0117508	0.0114609	0.011448	0.0113751	0.0112265	0.0112839	0.011491	0.011695	0.0119613	0.0122122
NO	1672	0.0167348	0.0168008	0.0167189	0.0165047	0.0163893	0.0163556	0.0163453	0.0164296	0.0164197	0.0161046	0.015736	0.0156407	0.0157806	0.0159433	0.015982	0.0158251	0.0155129	0.0152277	0.0151003	0.0151004	0.0152052	0.0153311	0.0153376	0.0152992	0.015218	0.0149502	0.0148098	0.0150025	0.0151622	0.0152326	0.0153303	0.0152588	0.0149812	0.0146395	0.0144102	0.0143734	0.0143821	0.01436	0.0143428	0.0142934	0.0141794	0.0139843	0.0137301	0.0136293	0.0137626	0.0139431	0.0140489	0.0139941
AE	1583	0.0200034	0.0198019	0.0197433	0.0198093	0.0198029	0.019665	0.0194996	0.0194965	0.01955	0.019522	0.0195589	0.0196888	0.0197921	0.0197354	0.0194487	0.0191173	0.0190133	0.0192597	0.0196149	0.0196462	0.0192907	0.0188142	0.0185014	0.0185082	0.0186809	0.0186483	0.0185397	0.0186201	0.0185233	0.0182232	0.0181616	0.0183212	0.0184808	0.018437	0.018124	0.0179434	0.0181931	0.0185359	0.0186433	0.0186531	0.0184601	0.0178359	0.0171881	0.0170108	0.0171857	0.0175742	0.0183137	0.019159
AE	1583	0.0173367	0.0173457	0.0172818	0.0171396	0.0169955	0.0168266	0.0166788	0.0166933	0.0167691	0.0167488	0.0167551	0.0168317	0.016823	0.0167707	0.0167418	0.0166181	0.0164483	0.0164166	0.0165129	0.0165681	0.016464	0.0162534	0.0160764	0.0159783	0.0159215	0.0158366	0.0156738	0.0155409	0.0155717	0.0156988	0.015788	0.0157636	0.0156153	0.0154443	0.0153154	0.0151992	0.0151407	0.0151364	0.0150422	0.0148927	0.0148484	0.0148	0.0146388	0.0145583	0.0145584	0.0145186	0.0145239	0.0145366
H	1583	0.0163816	0.0161781	0.0158346	0.0156189	0.015675	0.0157289	0.0156451	0.015625	0.0157348	0.0157951	0.0156869	0.0154724	0.0153095	0.0152515	0.0152293	0.0153128	0.0154876	0.0155019	0.01534	0.0151767	0.0150236	0.0148719	0.0148002	0.0147976	0.0147209	0.0145902	0.0145784	0.0146415	0.0146287	0.0145687	0.0145368	0.0144475	0.0142745	0.0141288	0.0140007	0.0139034	0.0139277	0.0139634	0.0139044	0.0138334	0.0137965	0.0137769	0.0137432	0.0136779	0.0135585	0.0133722	0.0132149	0.0131729
H	1583	0.0175073	0.0173175	0.0173782	0.0175442	0.0175349	0.0174063	0.0173842	0.0174463	0.017443	0.0173598	0.0172729	0.0171973	0.0171199	0.0170261	0.0168842	0.0167656	0.0167351	0.0167491	0.0168031	0.0168559	0.0167989	0.0166866	0.0166273	0.0165505	0.016395	0.0162451	0.0162095	0.0162361	0.0161501	0.0160213	0.0159625	0.0158343	0.0156392	0.0155791	0.0156594	0.0156815	0.0155945	0.0154964	0.0154356	0.0153302	0.0151713	0.0151059	0.0151091	0.0150769	0.0150686	0.0150877	0.0150478	0.0149204
NO	1583	0.0172139	0.0171085	0.017055	0.0170305	0.0170558	0.0171057	0.0170254	0.0168309	0.0166918	0.0165743	0.0164484	0.0164714	0.0166284	0.0166873	0.016621	0.0166235	0.0167713	0.016853	0.0166321	0.0163215	0.0162125	0.0161578	0.015961	0.0157042	0.0155578	0.0155197	0.0155592	0.0155936	0.0153295	0.0149357	0.0149418	0.0152701	0.0154113	0.0152245	0.015023	0.01497	0.0149525	0.0147775	0.0145633	0.0146014	0.0145976	0.0142461	0.0139206	0.014039	0.0144756	0.0147618	0.0147377	0.0144396
NO	1583	0.0174322	0.017528	0.017683	0.0176802	0.0175166	0.0174057	0.0174705	0.0175671	0.0176101	0.0175923	0.0174343	0.0172503	0.0171239	0.0169528	0.0168248	0.0168478	0.0169527	0.0170466	0.0169973	0.0167453	0.0165263	0.0165387	0.0166111	0.0165627	0.016376	0.0160447	0.0157551	0.0156977	0.0157297	0.0157718	0.0159071	0.0160349	0.0160547	0.0159245	0.0157062	0.0156414	0.0157063	0.0156781	0.0156128	0.0156007	0.0153703	0.0149289	0.0147712	0.0149974	0.0153044	0.0153756	0.0152062	0.0150084
AE	1689	0.0158538	0.0159438	0.0159731	0.0159236	0.0158621	0.0158185	0.0156847	0.0154444	0.0152725	0.0153108	0.015497	0.0155814	0.0153863	0.0151083	0.0150403	0.0151146	0.0151405	0.0151264	0.0150886	0.0149341	0.0146719	0.0145334	0.0146046	0.0146272	0.0145002	0.0143829	0.014376	0.0144441	0.0143875	0.0142198	0.0142578	0.014528	0.0147417	0.0146629	0.014335	0.0140333	0.0139539	0.0140351	0.0140029	0.0138037	0.0136382	0.0135901	0.0135851	0.0135244	0.0133774	0.0132828	0.0134016	0.0135863
AE	1689	0.0177868	0.0177607	0.0177576	0.0178495	0.0179755	0.0179068	0.0175875	0.0173512	0.01739	0.0174188	0.0173117	0.0173061	0.0174133	0.0173962	0.0172413	0.0171421	0.017123	0.0171044	0.0170921	0.0169765	0.0166909	0.0164183	0.0162913	0.0162869	0.0163243	0.0163129	0.0163001	0.0163058	0.016149	0.0158782	0.0157085	0.0156107	0.0155782	0.0156812	0.0158532	0.0159013	0.0157179	0.0155184	0.0155169	0.0154857	0.0152808	0.0151826	0.0152969	0.0153207	0.0150919	0.014796	0.0147434	0.0149978
H	1689	0.0155813	0.0156737	0.015737	0.0157503	0.0156665	0.0154806	0.0153355	0.0153709	0.0155322	0.0156114	0.0154976	0.0153528	0.0152946	0.0151605	0.0149794	0.0149595	0.0149189	0.0145962	0.0142404	0.0142142	0.0144068	0.0145758	0.0146682	0.014699	0.0146411	0.0143922	0.014191	0.0142764	0.0142494	0.0140277	0.0140182	0.0141428	0.0141643	0.0139897	0.0136155	0.0132746	0.0131089	0.0130633	0.0130625	0.0130374	0.0129602	0.0129084	0.0130355	0.0132731	0.0132806	0.0129575	0.0126691	0.0126224
H	1689	0.018033	0.0180576	0.0180658	0.0180842	0.0180364	0.017912	0.0178212	0.0177569	0.0176255	0.017453	0.017389	0.0175566	0.0177829	0.0177453	0.0174582	0.017269	0.0172723	0.017171	0.0169117	0.0166755	0.0164793	0.016392	0.0164551	0.016572	0.0167085	0.0167679	0.0167252	0.0167232	0.0167055	0.016546	0.0162935	0.0160777	0.0160662	0.0162363	0.0162878	0.0161373	0.016028	0.0159442	0.0156912	0.0154758	0.0154631	0.0154548	0.0153961	0.0153079	0.0151542	0.0150877	0.0151833	0.0153174
NO	1689	0.0174325	0.0174791	0.01744	0.0174319	0.01761	0.0176915	0.0174599	0.0172126	0.0171809	0.0172631	0.0173892	0.0174989	0.0175254	0.0174309	0.0172598	0.0170672	0.0167271	0.0163591	0.0163734	0.0167662	0.0170713	0.0170168	0.0168068	0.0166649	0.0165531	0.0164179	0.0163411	0.0163066	0.0161489	0.0160085	0.0160736	0.0161788	0.0161981	0.016006	0.0155288	0.0152262	0.0152924	0.0152159	0.0149752	0.0150843	0.0153921	0.0154452	0.0151843	0.0148747	0.014812	0.0150524	0.0153449	0.0153423
NO	1689	0.0174644	0.0174781	0.0173792	0.0172218	0.0171084	0.0170202	0.0168986	0.016902	0.0170294	0.0169868	0.0167778	0.0167553	0.0169413	0.0169775	0.0167789	0.0166208	0.0166822	0.01675	0.0165487	0.0162531	0.0161485	0.0162243	0.0163053	0.0162481	0.0161669	0.0162194	0.016344	0.0163839	0.016134	0.0156853	0.0153931	0.0154089	0.0155687	0.0155161	0.0152659	0.0152026	0.0153362	0.0154471	0.0154842	0.0154763	0.0153467	0.0150472	0.0147738	0.0147365	0.0148418	0.0148836	0.0148562	0.014848
H	2017	0.0161318	0.0159221	0.0157854	0.0157266	0.0156088	0.0154153	0.0152928	0.0152721	0.0152437	0.0152077	0.0152311	0.0152103	0.0150931	0.0149881	0.0149173	0.0148726	0.0150527	0.0154843	0.015575	0.015135	0.014761	0.014717	0.0149074	0.0151769	0.0152983	0.015169	0.0150847	0.0151532	0.0149252	0.0144521	0.0142257	0.0143444	0.0146344	0.0146716	0.0142499	0.0138827	0.0139351	0.0139943	0.013654	0.013404	0.0133902	0.0130687	0.0125664	0.0125673	0.0129983	0.0133891	0.0137632	0.0141694
NO	2017	0.0207086	0.0208443	0.020592	0.020212	0.0200714	0.0202661	0.020488	0.0204489	0.0202971	0.0203004	0.0203651	0.0202923	0.020131	0.019954	0.0198748	0.019999	0.0200751	0.019814	0.0193129	0.0189518	0.0189182	0.0190836	0.0192359	0.0191799	0.0188819	0.0186493	0.0188068	0.019121	0.0191236	0.0188675	0.018687	0.0185963	0.0184249	0.0181631	0.0180416	0.0181018	0.018163	0.0180988	0.0180345	0.0181414	0.0182099	0.0178991	0.0174001	0.0172309	0.0173515	0.0175397	0.0178763	0.0181771
NO	2015	0.0147169	0.0148062	0.0149781	0.0150595	0.0149833	0.0148039	0.014552	0.0143638	0.0143176	0.0142544	0.0141479	0.0141405	0.0142103	0.0142538	0.0143411	0.0144765	0.0144583	0.0142693	0.0140296	0.0137857	0.0136549	0.0136977	0.0137607	0.0137743	0.0137723	0.0135611	0.0132363	0.0131604	0.0131941	0.0131169	0.013052	0.0131427	0.0133314	0.013218	0.0127129	0.0124934	0.0127712	0.0129581	0.0127447	0.012592	0.0125796	0.0124079	0.0122236	0.0122677	0.0123395	0.0123175	0.0124185	0.0125875
AE	2019	0.0120693	0.012106	0.0123758	0.0124995	0.0122615	0.011996	0.0119604	0.0119781	0.0118885	0.0117996	0.011749	0.0115996	0.011414	0.0113904	0.01147	0.01151	0.0114405	0.0112426	0.0110598	0.0110095	0.0109419	0.0108109	0.01088	0.0111334	0.0112053	0.0110283	0.0108363	0.0106911	0.0105509	0.0105659	0.0107092	0.0106758	0.0104351	0.0101207	0.00985879	0.00987604	0.0100593	0.0100198	0.00976819	0.00974739	0.00992028	0.00984765	0.00949166	0.00925203	0.0092624	0.00941622	0.0097341	0.0101109
H	2019	0.0122041	0.0121149	0.0118552	0.0115643	0.0113501	0.0113205	0.0114185	0.0114101	0.0112859	0.0111948	0.0111107	0.0110621	0.0111585	0.0112328	0.011025	0.0107366	0.0107551	0.0109026	0.0107929	0.0106283	0.0106424	0.0105982	0.0104955	0.0105604	0.0106132	0.0104304	0.0103308	0.0103899	0.0102447	0.0100266	0.00997733	0.00998899	0.0100598	0.0101319	0.0100305	0.00986931	0.00981316	0.00969842	0.00942693	0.00927266	0.00917524	0.0089023	0.00875482	0.00890482	0.00901788	0.00894673	0.00893084	0.00906903
NO	2019	0.0123083	0.012155	0.0121665	0.0122006	0.0121172	0.0120736	0.0120744	0.0119258	0.0117295	0.0117548	0.0119344	0.011947	0.0117368	0.0115175	0.0113948	0.0113966	0.011506	0.0116207	0.0115848	0.0113787	0.0111897	0.0110925	0.0110939	0.0112255	0.0113275	0.0111555	0.0108341	0.0106443	0.0104976	0.0102577	0.0101218	0.010194	0.01031	0.0103039	0.010239	0.0102366	0.0102565	0.0101671	0.00998311	0.00994575	0.0100363	0.00998931	0.00977438	0.00960517	0.0095284	0.00949263	0.00957994	0.00980675
H	2019	0.0162242	0.016306	0.0165242	0.0166619	0.0166713	0.0164848	0.0160631	0.0157152	0.0157203	0.0158693	0.0158774	0.0158357	0.0158687	0.0159479	0.016029	0.0159512	0.015596	0.0152065	0.0151126	0.0152187	0.0152559	0.0151855	0.0151038	0.0151364	0.0152668	0.0152679	0.0150797	0.0148869	0.0147725	0.0147303	0.0146541	0.0144576	0.0143683	0.0143773	0.0141738	0.0139453	0.0138972	0.0139805	0.0141869	0.0143011	0.014133	0.0138955	0.0138149	0.0138485	0.0139138	0.0138707	0.0136577	0.0134217
NO	2019	0.0174312	0.0175651	0.0175643	0.017176	0.01683	0.0168841	0.0170991	0.0171904	0.0171521	0.0171461	0.0171453	0.0169915	0.0167837	0.016701	0.016758	0.0168689	0.0169379	0.0168429	0.0164979	0.0162095	0.0162729	0.0164658	0.0166151	0.0166553	0.0163913	0.015962	0.0157187	0.0156463	0.0155583	0.0154716	0.015466	0.0154942	0.0154936	0.0154188	0.0153121	0.0153838	0.0156304	0.0156903	0.015487	0.0153398	0.0152613	0.0150703	0.0147376	0.0144071	0.0142471	0.014272	0.0144904	0.0148926
[truncated: 1,818 more columns]
